# Supplementary material for: New Analytical Method for Quantifying Flavoring Chemicals of Potential Respiratory Health Risk Concerns in e-Cigarette Liquids
Source: PubMed Central journal article supplement (PMC8581464; doi:10.3389/fchem.2021.763940), 2021-10-28
Supplement: DataSheet1.pdf [file DataSheet1.pdf]

Supplemental Table 1 – Neat Standard Procurement and Storage Conditions

| Vendor                   | Standard                | CAS        | Purity (%) | Physical State | Storage Condition           |
|--------------------------|-------------------------|------------|------------|----------------|-----------------------------|
| Acros Organics           | Butanoic Acid           | 107-92-6   | 99+        | Liquid         | Chemical Shelf              |
| Acros Organics           | Isovanillin             | 621-59-0   | 98         | Solid          | Chemical Shelf              |
| Acros Organics           | L-Limonene              | 5989-54-8  | 96         | Liquid         | Chemical Shelf              |
| Acros Organics           | L-Menthol               | 2216-51-5  | 99.5       | Solid          | Chemical Shelf              |
| Acros Organics           | Maltol                  | 118-71-8   | 99         | Solid          | Chemical Shelf              |
| Acros Organics           | Triacetin               | 102-76-1   | 99         | Liquid         | Chemical Shelf              |
| Alfa Aesar               | Benzyl Alcohol          | 100-51-6   | 99+        | Liquid         | Chemical Shelf              |
| Alfa Aesar               | D-Limonene              | 5989-27-5  | 97         | Liquid         | Chemical Shelf              |
| Alfa Aesar               | Ethyl Vanillin          | 121-32-4   | 98         | Solid          | Chemical Shelf              |
| Alfa Aesar               | Eucalyptol              | 470-82-6   | 99         | Liquid         | Chemical Shelf              |
| Alfa Aesar               | Vanillin                | 121-33-5   | 99         | Solid          | Chemical Shelf              |
| Cambridge Isotopes       | Acenaphthene-d10        | 15067-26-2 | 99         | Solid          | Chemical Shelf              |
| Cambridge Isotopes       | Benzene-d6              | 1076-43-3  | 99.5       | Liquid         | Chemical Shelf              |
| Cambridge Isotopes       | Chlorobenzene-d5        | 3114-55-4  | 99         | Liquid         | Chemical Shelf              |
| Cambridge Isotopes       | Pyridine-d5             | 7291-22-7  | 99.5       | Liquid         | Chemical Shelf              |
| Santa Cruz Biotechnology | Acetoin                 | 513-86-0   | 97         | Solid          | 4-8°C                       |
| Santa Cruz Biotechnology | Naphthalene-d8          | 1146-65-2  | NA         | Solid          | Chemical Shelf              |
| Sigma Aldrich            | Benzaldehyde            | 100-52-7   | 99.5       | Liquid         | Chemical Shelf, under argon |
| Sigma Aldrich            | Eugenol                 | 97-53-0    | 99         | Liquid         | Chemical Shelf              |
| Sigma Aldrich            | Furaneol                | 3658-77-3  | 99         | Solid          | 4-8°C, under argon          |
| Sigma Aldrich            | Methyl Salicylate       | 119-36-8   | 99         | Liquid         | Chemical Shelf              |
| TCI                      | (+)Pulegone             | 89-82-7    | 95         | Liquid         | Chemical Shelf              |
| TCI                      | 2,3,5-Trimethylpyrazine | 14667-55-1 | 98         | Liquid         | Chemical Shelf              |
| TCI                      | Ethyl Maltol            | 4940-11-8  | 99         | Solid          | Chemical Shelf              |
| TCI                      | Ethyl Salicylate        | 118-61-6   | 99         | Liquid         | Chemical Shelf              |
| TCI                      | trans-Cinnamaldehyde    | 14371-10-9 | 98         | Liquid         | Chemical Shelf              |

Supplemental Table 2 – Preparation Information for Calibration and Quality Control (QC) Standards

| Standard ID          | Volume of Neat Standard (µL) | Volume of 20mg/mL Working Solution <sup>2</sup> (µL) | Volume of Previous Calibration Level (µL) | Volume of 50:50 PG:VG (5% H <sub>2</sub> O) (µL) | Total Volume (µL) | Concentration (mg/mL) |
|----------------------|------------------------------|------------------------------------------------------|-------------------------------------------|--------------------------------------------------|-------------------|-----------------------|
| Initial Calibration  |                              |                                                      |                                           |                                                  |                   |                       |
| C10                  | 100, each <sup>1</sup>       | 5000                                                 | NA                                        | 3700                                             | 10,000            | 10.0                  |
| C9                   | ---                          | ---                                                  | 5000 (of C10)                             | 5000                                             | 10,000            | 5.00                  |
| C8                   | ---                          | ---                                                  | 5000 (of C9)                              | 5000                                             | 10,000            | 2.50                  |
| C7                   | ---                          | ---                                                  | 5000 (of C8)                              | 5000                                             | 10,000            | 1.25                  |
| C6                   | ---                          | ---                                                  | 5000 (of C7)                              | 5000                                             | 10,000            | 0.63                  |
| C5                   | ---                          | ---                                                  | 5000 (of C6)                              | 5000                                             | 10,000            | 0.31                  |
| C4                   | ---                          | ---                                                  | 5000 (of C5)                              | 5000                                             | 10,000            | 0.16                  |
| C3                   | ---                          | ---                                                  | 5000 (of C4)                              | 5000                                             | 10,000            | 0.08                  |
| C2                   | ---                          | ---                                                  | 5000 (of C3)                              | 5000                                             | 10,000            | 0.04                  |
| C1                   | ---                          | ---                                                  | 5000 (of C2)                              | 5000                                             | 10,000            | 0.02                  |
| C0                   | ---                          | ---                                                  | ---                                       | 5000                                             | 10,000            |                       |
| Quality Control (QC) |                              |                                                      |                                           |                                                  |                   |                       |
| QC9                  | 80, each <sup>1</sup>        | 4000                                                 | NA                                        | 4960                                             | 10,000            | 8.00                  |
| QC8                  | ---                          | ---                                                  | 5000 (of QC9)                             | 5000                                             | 10,000            | 4.00                  |
| QC7                  | ---                          | ---                                                  | 5000 (of QC8)                             | 5000                                             | 10,000            | 2.00                  |
| QC6                  | ---                          | ---                                                  | 5000 (of QC7)                             | 5000                                             | 10,000            | 1.00                  |
| QC5                  | ---                          | ---                                                  | 5000 (of QC6)                             | 5000                                             | 10,000            | 0.50                  |
| QC4                  | ---                          | ---                                                  | 5000 (of QC5)                             | 5000                                             | 10,000            | 0.25                  |
| QC3                  | ---                          | ---                                                  | 5000 (of QC4)                             | 5000                                             | 10,000            | 0.13                  |
| QC2                  | ---                          | ---                                                  | 5000 (of QC3)                             | 5000                                             | 10,000            | 0.06                  |
| QC1                  | ---                          | ---                                                  | 5000 (of QC2)                             | 5000                                             | 10,000            | 0.03                  |

<sup>1</sup>Refer to Supplemental Table 1 for each liquid neat standard to be added

<sup>2</sup>Prepared by weighting 2.0000 ± 0.0005mg of each neat solid standard (see Supplemental Table 1) into 100mL of methanol and hand-vortex 5 min, or until visible granules are dissolved.

Supplemental Table 3 – Initial Calibration Parameters of Twenty Flavoring Chemicals

|                         | Instrument<br>Linear<br>Range <sup>1</sup><br>(mg/mL) | Working<br>Calibration<br>Range <sup>2</sup><br>(mg/mL) | Calibration<br>Curve Fit    | Average <sup>3</sup><br>Coefficient of<br>Determination<br>(r <sup>2</sup> ) | Average <sup>3</sup><br>RRF | Average <sup>3</sup><br>RRT | Average <sup>3</sup><br>RSE<br>(%) | LLOQ<br>(mg/mL) | S:N <sup>4</sup><br>at LLOQ |
|-------------------------|-------------------------------------------------------|---------------------------------------------------------|-----------------------------|------------------------------------------------------------------------------|-----------------------------|-----------------------------|------------------------------------|-----------------|-----------------------------|
| Acetoin                 | 0.31-10.00                                            | 0.31-10.00                                              | Quadratic, 1/x <sup>2</sup> | 0.995                                                                        | 0.03                        | 1.24                        | 6.9                                | 0.31            | 715                         |
| Butanoic Acid           | 0.16-10.00                                            | 0.63-10.00                                              | Quadratic, 1/x <sup>2</sup> | 0.995                                                                        | 0.34                        | 1.13                        | 7.2                                | 0.63            | 59                          |
| Benzaldehyde            | 0.02-10.00                                            | 0.02-10.00                                              | Quadratic, 1/x <sup>2</sup> | 0.996                                                                        | 0.56                        | 1.12                        | 6.7                                | 0.02            | 45                          |
| 2,3,5-Trimethylpyrazine | 0.02-10.00                                            | 0.02-10.00                                              | Quadratic, 1/x <sup>2</sup> | 0.995                                                                        | 0.70                        | 1.24                        | 7.9                                | 0.02            | 846                         |
| DL-Limonene             | 0.08-10.00                                            | 0.08-10.00                                              | Quadratic, 1/x <sup>2</sup> | 0.993                                                                        | 0.14                        | 1.26                        | 8.3                                | 0.08            | 891                         |
| Eucalyptol              | 0.04-10.00                                            | 0.04-10.00                                              | Quadratic, 1/x <sup>2</sup> | 0.995                                                                        | 0.09                        | 1.29                        | 7.0                                | 0.04            | 438                         |
| Benzyl Alcohol          | 0.02-5.00                                             | 0.02-5.00                                               | Quadratic, 1/x <sup>2</sup> | 0.995                                                                        | 0.54                        | 1.35                        | 7.1                                | 0.02            | 164                         |
| Furaneol                | 0.02-5.00                                             | 0.02-5.00                                               | Quadratic, 1/x <sup>2</sup> | 0.994                                                                        | 0.25                        | 1.37                        | 7.8                                | 0.02            | 35                          |
| Maltol                  | 0.16-10.00                                            | 0.63-10.00                                              | Quadratic, 1/x <sup>2</sup> | 0.992                                                                        | 0.49                        | 1.47                        | 8.9                                | 0.63            | 580                         |
| L-Menthol               | 0.08-10.00                                            | 0.08-10.00                                              | Quadratic, 1/x <sup>2</sup> | 0.997                                                                        | 0.08                        | 1.51                        | 5.6                                | 0.08            | 631                         |
| Methyl Salicylate       | 0.08-10.00                                            | 0.08-10.00                                              | Quadratic, 1/x <sup>2</sup> | 0.993                                                                        | 0.36                        | 1.00                        | 8.5                                | 0.08            | 2212                        |
| Ethyl Maltol            | 0.08-10.00                                            | 0.63-10.00                                              | Quadratic, 1/x <sup>2</sup> | 0.992                                                                        | 0.24                        | 1.02                        | 8.4                                | 0.63            | 492                         |
| (+)Pulegone             | 0.02-10.00                                            | 0.02-10.00                                              | Quadratic, 1/x <sup>2</sup> | 0.995                                                                        | 0.19                        | 1.04                        | 6.5                                | 0.02            | 1256                        |
| Ethyl Salicylate        | 0.02-10.00                                            | 0.02-10.00                                              | Quadratic, 1/x <sup>2</sup> | 0.993                                                                        | 0.37                        | 1.06                        | 8.2                                | 0.02            | 1986                        |
| trans-Cinnamaldehyde    | 0.02-5.00                                             | 0.16-5.00                                               | Quadratic, 1/x <sup>2</sup> | 0.995                                                                        | 0.33                        | 1.09                        | 7.7                                | 0.16            | 157                         |
| Triacetin               | 0.02-10.00                                            | 0.04-10.00                                              | Quadratic, 1/x <sup>2</sup> | 0.997                                                                        | 0.18                        | 1.12                        | 5.7                                | 0.04            | 10                          |
| Eugenol                 | 0.04-10.00                                            | 0.04-10.00                                              | Quadratic, 1/x <sup>2</sup> | 0.994                                                                        | 0.38                        | 1.15                        | 7.6                                | 0.04            | 652                         |
| Vanillin                | 0.31-10.00                                            | 0.63-10.00                                              | Quadratic, 1/x <sup>2</sup> | 0.994                                                                        | 0.24                        | 1.26                        | 7.9                                | 0.63            | 159                         |
| Ethyl Vanillin          | 0.04-10.00                                            | 0.31-10.00                                              | Quadratic, 1/x <sup>2</sup> | 0.995                                                                        | 0.14                        | 1.32                        | 7.3                                | 0.31            | 1125                        |
| Isovanillin             | 0.04-10.00                                            | 0.31-10.00                                              | Quadratic, 1/x <sup>2</sup> | 0.994                                                                        | 0.28                        | 1.02                        | 7.7                                | 0.31            | 162                         |

<sup>1</sup>Determined from percent recovery values ( $\pm 20\%$ ) of each calibrator

<sup>2</sup>Determined from method validation parameters, including LLOQ and carryover analysis and represents calibration range applicable to quantitation of e-cigarette liquids

<sup>3</sup>Average of 7 independent batches analyzed across 7 days

<sup>4</sup>S:N = Signal/Noise ratio. Value calculated and provided by automated instrument software during data analysis. Acceptable peak identification from baseline noise is considered 10:1.

Supplemental Table 4 – Average Recovery and Coefficient of Variation (CV) Across 7 Calibration Batches

| Level                                                | Initial Calibration            |            |            |           |      |      |      |      |     |           | Quality Control |            |            |           |      |     |     |     |           |     |
|------------------------------------------------------|--------------------------------|------------|------------|-----------|------|------|------|------|-----|-----------|-----------------|------------|------------|-----------|------|-----|-----|-----|-----------|-----|
|                                                      | 1                              | 2          | 3          | 4         | 5    | 6    | 7    | 8    | 9   | 10        | 1               | 2          | 3          | 4         | 5    | 6   | 7   | 8   | 9         |     |
|                                                      | Expected Concentration (mg/mL) | 0.02       | 0.04       | 0.08      | 0.16 | 0.31 | 0.63 | 1.25 | 2.5 | 5.0       | 10.0            | 0.03       | 0.06       | 0.13      | 0.25 | 0.5 | 1.0 | 2.0 | 4.0       | 8.0 |
| <b>Percent Recovery (%)<sup>1</sup></b>              |                                |            |            |           |      |      |      |      |     |           |                 |            |            |           |      |     |     |     |           |     |
| Acetoin                                              | <b>0</b>                       | <b>15</b>  | <b>41</b>  | <b>74</b> | 101  | 97   | 99   | 102  | 100 | 100       | <b>0</b>        | <b>12</b>  | <b>43</b>  | <b>67</b> | 102  | 100 | 100 | 101 | 97        |     |
| Butanoic Acid                                        | <b>30</b>                      | <b>26</b>  | <b>88</b>  | 102       | 95   | 97   | 99   | 106  | 107 | 96        | <b>25</b>       | <b>26</b>  | <b>78</b>  | 90        | 91   | 96  | 101 | 107 | 100       |     |
| Benzaldehyde                                         | 99                             | 99         | 95         | 98        | 98   | 100  | 106  | 107  | 104 | 94        | 91              | 94         | 93         | 93        | 95   | 100 | 102 | 102 | 96        |     |
| 2,3,5-Trimethylpyrazine                              | 105                            | 96         | 94         | 95        | 96   | 99   | 109  | 110  | 104 | 91        | 95              | 90         | 90         | 91        | 94   | 101 | 105 | 102 | 92        |     |
| DL-Limonene                                          | <b>55</b>                      | <b>90</b>  | 97         | 99        | 99   | 98   | 99   | 98   | 108 | 97        | <b>58</b>       | <b>81</b>  | 102        | 100       | 105  | 103 | 102 | 111 | 105       |     |
| Eucalyptol                                           | <b>87</b>                      | 99         | 99         | 100       | 98   | 100  | 101  | 101  | 102 | 99        | <b>90</b>       | 99         | 96         | 98        | 99   | 98  | 98  | 102 | 96        |     |
| Benzyl Alcohol                                       | 93                             | 102        | 100        | 95        | 98   | 97   | 105  | 108  | 104 | <b>67</b> | 102             | 94         | 92         | 94        | 96   | 102 | 108 | 107 | <b>71</b> |     |
| Furaneol                                             | 102                            | 88         | 100        | 97        | 102  | 102  | 106  | 104  | 96  | <b>13</b> | 104             | 105        | 95         | 101       | 103  | 106 | 104 | 105 | <b>14</b> |     |
| Maltol                                               | <b>45</b>                      | <b>55</b>  | <b>86</b>  | 93        | 94   | 96   | 104  | 111  | 108 | 93        | <b>43</b>       | <b>56</b>  | <b>79</b>  | 90        | 94   | 100 | 107 | 109 | 98        |     |
| L-Menthol                                            | <b>73</b>                      | <b>82</b>  | 100        | 100       | 101  | 98   | 102  | 101  | 101 | 99        | <b>61</b>       | <b>87</b>  | 99         | 99        | 98   | 100 | 99  | 101 | 100       |     |
| Methyl Salicylate                                    | <b>85</b>                      | <b>85</b>  | 95         | 93        | 97   | 100  | 107  | 111  | 106 | 92        | <b>82</b>       | <b>81</b>  | 94         | 95        | 97   | 104 | 107 | 107 | 96        |     |
| Ethyl Maltol                                         | <b>45</b>                      | <b>71</b>  | 100        | 91        | 95   | 96   | 104  | 109  | 110 | 94        | <b>42</b>       | <b>65</b>  | 95         | 92        | 94   | 103 | 109 | 113 | 100       |     |
| (+)Pulegone                                          | 98                             | 99         | 103        | 95        | 100  | 97   | 101  | 104  | 106 | 96        | 104             | 94         | 103        | 98        | 98   | 101 | 103 | 104 | 99        |     |
| Ethyl Salicylate                                     | 99                             | 95         | 94         | 97        | 97   | 100  | 107  | 112  | 107 | 92        | 98              | 93         | 95         | 93        | 98   | 105 | 109 | 110 | 97        |     |
| trans-Cinnamaldehyde                                 | 99                             | 98         | 97         | 97        | 101  | 101  | 107  | 104  | 94  | <b>14</b> | 103             | 97         | 95         | 97        | 100  | 104 | 106 | 102 | <b>14</b> |     |
| Triacetin                                            | 100                            | 98         | 98         | 99        | 98   | 100  | 101  | 104  | 104 | 97        | 93              | 94         | 95         | 93        | 96   | 96  | 99  | 102 | 97        |     |
| Eugenol                                              | <b>86</b>                      | 95         | 95         | 95        | 97   | 100  | 106  | 110  | 108 | 92        | <b>87</b>       | 96         | 94         | 96        | 99   | 106 | 110 | 112 | 99        |     |
| Vanillin                                             | <b>71</b>                      | <b>70</b>  | <b>70</b>  | <b>81</b> | 96   | 101  | 101  | 105  | 108 | 95        | <b>67</b>       | <b>65</b>  | <b>66</b>  | <b>80</b> | 94   | 98  | 104 | 109 | 100       |     |
| Ethyl Vanillin                                       | <b>91</b>                      | 95         | 97         | 96        | 96   | 100  | 103  | 106  | 108 | 95        | <b>86</b>       | 99         | 95         | 94        | 95   | 102 | 104 | 110 | 99        |     |
| Isovanillin                                          | <b>90</b>                      | 98         | 97         | 95        | 96   | 100  | 104  | 106  | 107 | 94        | <b>92</b>       | 95         | 92         | 95        | 99   | 101 | 104 | 108 | 97        |     |
| Benzene-d6                                           | 107                            | 104        | 103        | 103       | 102  | 103  | 100  | 101  | 101 | 101       | 95              | 95         | 94         | 95        | 94   | 95  | 95  | 94  | 96        |     |
| Pyridine-d5                                          | 105                            | 104        | 102        | 102       | 102  | 101  | 100  | 100  | 100 | 100       | 97              | 98         | 97         | 96        | 96   | 96  | 94  | 95  | 95        |     |
| Chlorobenzene-d5                                     | 107                            | 105        | 101        | 102       | 103  | 103  | 100  | 101  | 101 | 102       | 97              | 98         | 97         | 98        | 97   | 97  | 97  | 97  | 97        |     |
| Naphthalene-d8                                       | 106                            | 104        | 101        | 101       | 101  | 102  | 100  | 100  | 98  | 97        | 96              | 97         | 96         | 96        | 97   | 96  | 95  | 94  | 93        |     |
| Acenaphthene-d10                                     | 107                            | 105        | 102        | 102       | 103  | 102  | 100  | 101  | 100 | 99        | 98              | 98         | 98         | 98        | 97   | 98  | 98  | 96  | 95        |     |
| <b>Coefficient of Variation (CV) (%)<sup>1</sup></b> |                                |            |            |           |      |      |      |      |     |           |                 |            |            |           |      |     |     |     |           |     |
| Acetoin                                              | <b>N/A</b>                     | <b>265</b> | <b>125</b> | <b>69</b> | 6    | 7    | 6    | 4    | 3   | 2         | <b>N/A</b>      | <b>265</b> | <b>126</b> | <b>70</b> | 14   | 6   | 5   | 4   | 4         |     |

|                         |            |            |           |           |   |   |   |   |   |            |            |            |           |           |   |   |   |   |            |
|-------------------------|------------|------------|-----------|-----------|---|---|---|---|---|------------|------------|------------|-----------|-----------|---|---|---|---|------------|
| Butanoic Acid           | <b>171</b> | <b>171</b> | <b>46</b> | 6         | 4 | 5 | 3 | 2 | 3 | 2          | <b>171</b> | <b>171</b> | <b>45</b> | 9         | 5 | 5 | 3 | 3 | 2          |
| Benzaldehyde            | 6          | 8          | 5         | 3         | 3 | 4 | 3 | 2 | 2 | 3          | 10         | 7          | 7         | 4         | 4 | 3 | 4 | 2 | 4          |
| 2,3,5-Trimethylpyrazine | 3          | 6          | 2         | 4         | 3 | 2 | 1 | 2 | 2 | 4          | 7          | 7          | 3         | 5         | 3 | 3 | 3 | 4 | 4          |
| DL-Limonene             | <b>95</b>  | <b>46</b>  | 9         | 10        | 6 | 3 | 2 | 4 | 3 | 2          | <b>95</b>  | <b>46</b>  | 7         | 7         | 8 | 8 | 7 | 5 | 2          |
| Eucalyptol              | <b>44</b>  | 13         | 8         | 9         | 7 | 4 | 3 | 4 | 3 | 2          | <b>46</b>  | 8          | 8         | 6         | 4 | 3 | 2 | 4 | 2          |
| Benzyl Alcohol          | 8          | 6          | 4         | 6         | 3 | 3 | 1 | 3 | 5 | <b>68</b>  | 11         | 11         | 6         | 5         | 6 | 5 | 4 | 4 | <b>68</b>  |
| Furaneol                | 5          | 7          | 8         | 3         | 4 | 2 | 4 | 5 | 7 | <b>265</b> | 8          | 8          | 9         | 6         | 3 | 2 | 2 | 3 | <b>265</b> |
| Maltol                  | <b>125</b> | <b>94</b>  | <b>44</b> | 6         | 3 | 4 | 3 | 3 | 2 | 2          | <b>125</b> | <b>94</b>  | <b>44</b> | 4         | 6 | 5 | 3 | 3 | 3          |
| L-Menthol               | <b>68</b>  | <b>45</b>  | 7         | 6         | 6 | 6 | 4 | 3 | 3 | 2          | <b>70</b>  | <b>47</b>  | 9         | 5         | 3 | 5 | 2 | 3 | 4          |
| Methyl Salicylate       | <b>46</b>  | <b>44</b>  | 6         | 3         | 3 | 3 | 4 | 2 | 2 | 3          | <b>44</b>  | <b>45</b>  | 6         | 4         | 2 | 2 | 4 | 2 | 4          |
| Ethyl Maltol            | <b>125</b> | <b>69</b>  | 5         | 5         | 4 | 5 | 2 | 2 | 2 | 1          | <b>125</b> | <b>68</b>  | 6         | 5         | 4 | 5 | 1 | 3 | 1          |
| (+)Pulegone             | 7          | 9          | 7         | 5         | 3 | 3 | 3 | 3 | 2 | 2          | 12         | 7          | 7         | 4         | 4 | 2 | 2 | 4 | 1          |
| Ethyl Salicylate        | 7          | 5          | 7         | 3         | 2 | 3 | 2 | 1 | 3 | 2          | 4          | 4          | 5         | 3         | 2 | 3 | 1 | 3 | 3          |
| trans-Cinnamaldehyde    | 10         | 8          | 4         | 3         | 4 | 3 | 4 | 2 | 6 | <b>265</b> | 11         | 6          | 5         | 3         | 3 | 2 | 2 | 5 | <b>265</b> |
| Triacetin               | 6          | 8          | 4         | 6         | 4 | 4 | 2 | 2 | 2 | 1          | 15         | 11         | 5         | 2         | 4 | 3 | 2 | 3 | 1          |
| Eugenol                 | <b>44</b>  | 6          | 6         | 1         | 4 | 2 | 4 | 2 | 2 | 3          | <b>45</b>  | 3          | 4         | 2         | 3 | 4 | 2 | 3 | 2          |
| Vanillin                | <b>70</b>  | <b>68</b>  | <b>69</b> | <b>44</b> | 2 | 4 | 6 | 4 | 3 | 3          | <b>69</b>  | <b>69</b>  | <b>68</b> | <b>44</b> | 6 | 6 | 5 | 4 | 3          |
| Ethyl Vanillin          | <b>45</b>  | 10         | 5         | 8         | 3 | 4 | 3 | 2 | 3 | 1          | <b>48</b>  | 6          | 6         | 4         | 2 | 5 | 2 | 3 | 4          |
| Isovanillin             | <b>45</b>  | 8          | 7         | 5         | 4 | 3 | 3 | 2 | 4 | 3          | <b>45</b>  | 7          | 6         | 5         | 4 | 8 | 4 | 3 | 2          |
| Benzene-d6              | 4          | 6          | 4         | 3         | 3 | 4 | 0 | 2 | 2 | 3          | 4          | 6          | 2         | 4         | 3 | 4 | 4 | 3 | 3          |
| Pyridine-d5             | 5          | 6          | 4         | 5         | 3 | 3 | 0 | 3 | 2 | 2          | 3          | 4          | 4         | 3         | 4 | 4 | 4 | 3 | 3          |
| Chlorobenzene-d5        | 6          | 8          | 4         | 3         | 2 | 1 | 0 | 3 | 2 | 1          | 3          | 5          | 3         | 4         | 2 | 4 | 3 | 2 | 3          |
| Naphthalene-d8          | 4          | 5          | 2         | 2         | 3 | 3 | 0 | 2 | 2 | 2          | 2          | 3          | 2         | 2         | 2 | 4 | 3 | 3 | 3          |
| Acenaphthene-d10        | 7          | 7          | 3         | 3         | 3 | 3 | 0 | 3 | 2 | 3          | 3          | 2          | 2         | 3         | 2 | 4 | 3 | 2 | 2          |

<sup>1</sup>Averaged from 7 independent batches analyzed across 7 days

Italicized and grey indicates values outside of the instrument linear range where recovery is estimated. Bold indicates values outside of 80-120% percent recovery or  $\pm 20\%$  CV.

Supplemental Table 5 – Method Validation Parameters for Mid-Range and Low-Range Fortified Matrix Samples Across 7 Batches

| Method Validation Measure <sup>1</sup> | Mid-Range Fortified Matrix Samples |      |      |      |     |     | LLOQ Fortified Matrix Samples |      |      |      |      |     |
|----------------------------------------|------------------------------------|------|------|------|-----|-----|-------------------------------|------|------|------|------|-----|
|                                        | Expected Concentration (mg/mL)     |      |      |      |     |     |                               |      |      |      |      |     |
|                                        | 0.04                               | 0.10 | 0.88 | 1.75 | 3.5 | 7.0 | 0.01                          | 0.04 | 0.07 | 0.10 | 0.27 |     |
| <b>Acetoin</b>                         |                                    |      |      |      |     |     |                               |      |      |      |      |     |
| <b>Within Batch Precision (%)</b>      |                                    |      |      |      |     |     |                               |      |      |      |      |     |
| <i>Batch #</i>                         | 1                                  | 8    | 19   | 4    | 7   | 4   | 2                             | ---  | 21   | 29   | 7    | 5   |
|                                        | 2                                  | 27   | 4    | 9    | 6   | 3   | 1                             | ---  | 33   | 3    | 20   | 11  |
|                                        | 3                                  | 9    | 8    | 3    | 4   | 3   | 4                             | ---  | 8    | 4    | 9    | 10  |
|                                        | 4                                  | 6    | 38   | 4    | 6   | 1   | 3                             | ---  | 41   | 50   | 19   | 14  |
|                                        | 5                                  | ---  | 5    | 6    | 2   | 6   | 7                             | ---  | ---  | ---  | 20   | 15  |
|                                        | 6                                  | ---  | 92   | 5    | 6   | 2   | 5                             | ---  | 5    | ---  | ---  | 9   |
|                                        | 7                                  | ---  | ---  | 7    | 4   | 9   | 2                             | ---  | ---  | 5    | 29   | 4   |
| <b>Between Batch Precision (%)</b>     |                                    | 68   | 33   | 6    | 6   | 6   | 5                             | ---  | 50   | 53   | 29   | 12  |
| <b>Between Batch Bias (%)</b>          |                                    | 37   | 17   | 2    | 1   | 1   | 1                             | ---  | 48   | 0    | 9    | 5   |
| <b>Butanoic Acid</b>                   |                                    |      |      |      |     |     |                               |      |      |      |      |     |
| <b>Within Batch Precision (%)</b>      |                                    |      |      |      |     |     |                               |      |      |      |      |     |
| <i>Batch #</i>                         | 1                                  | 8    | 7    | 5    | 5   | 3   | 1                             | 19   | 5    | 6    | 9    | 3   |
|                                        | 2                                  | 7    | 10   | 2    | 2   | 3   | 2                             | 2    | 5    | 5    | 11   | 2   |
|                                        | 3                                  | 10   | 5    | 0    | 2   | 3   | 2                             | 7    | 14   | 7    | 8    | 6   |
|                                        | 4                                  | 4    | 6    | 0    | 1   | 1   | 4                             | 7    | 6    | 5    | 5    | 2   |
|                                        | 5                                  | 6    | 3    | 1    | 2   | 2   | 2                             | 20   | 8    | 0    | 2    | 5   |
|                                        | 6                                  | 17   | 10   | 4    | 3   | 2   | 1                             | 51   | 19   | 14   | 10   | 7   |
|                                        | 7                                  | 11   | 7    | 3    | 3   | 3   | 3                             | ---  | 29   | 9    | 3    | 7   |
| <b>Between Batch Precision (%)</b>     |                                    | 32   | 14   | 4    | 3   | 3   | 5                             | 43   | 30   | 17   | 14   | 8   |
| <b>Between Batch Bias (%)</b>          |                                    | 39   | -2   | -8   | -2  | 4   | 1                             | 252  | 36   | 4    | -4   | -13 |
| <b>Benzaldehyde</b>                    |                                    |      |      |      |     |     |                               |      |      |      |      |     |
| <b>Within Batch Precision (%)</b>      |                                    |      |      |      |     |     |                               |      |      |      |      |     |
| <i>Batch #</i>                         | 1                                  | 11   | 2    | 5    | 2   | 4   | 5                             | 18   | 7    | 4    | 4    | 0   |
|                                        | 2                                  | 6    | 4    | 1    | 3   | 2   | 4                             | 15   | 3    | 4    | 1    | 5   |
|                                        | 3                                  | 2    | 3    | 1    | 2   | 3   | 4                             | 10   | 4    | 6    | 4    | 4   |
|                                        | 4                                  | 4    | 7    | 3    | 5   | 1   | 1                             | 18   | 2    | 3    | 5    | 6   |
|                                        | 5                                  | 11   | 6    | 1    | 1   | 2   | 3                             | 21   | 6    | 7    | 13   | 2   |
|                                        | 6                                  | 13   | 4    | 2    | 1   | 3   | 1                             | 28   | 1    | 8    | 4    | 5   |
|                                        | 7                                  | 8    | 2    | 1    | 2   | 4   | 0                             | 4    | 9    | 4    | 3    | 5   |
| <b>Between Batch Precision (%)</b>     |                                    | 8    | 6    | 4    | 5   | 4   | 4                             | 30   | 12   | 8    | 7    | 6   |

|                               |    |     |    |    |   |    |    |    |    |    |    |
|-------------------------------|----|-----|----|----|---|----|----|----|----|----|----|
| <b>Between Batch Bias (%)</b> | -5 | -10 | -5 | -1 | 0 | -2 | -5 | -5 | -6 | -5 | -5 |
|-------------------------------|----|-----|----|----|---|----|----|----|----|----|----|

**2,3,5-Trimethylpyrazine**

|                                    |   |    |   |   |   |   |   |    |    |    |    |    |
|------------------------------------|---|----|---|---|---|---|---|----|----|----|----|----|
| <b>Within Batch Precision (%)</b>  |   |    |   |   |   |   |   |    |    |    |    |    |
| Batch #                            | 1 | 3  | 2 | 1 | 1 | 1 | 4 | 2  | 7  | 7  | 6  | 2  |
|                                    | 2 | 4  | 1 | 2 | 2 | 1 | 2 | 5  | 0  | 5  | 1  | 2  |
|                                    | 3 | 7  | 4 | 2 | 2 | 2 | 2 | 7  | 9  | 2  | 4  | 3  |
|                                    | 4 | 4  | 3 | 2 | 4 | 0 | 2 | 9  | 11 | 3  | 8  | 0  |
|                                    | 5 | 1  | 4 | 2 | 2 | 0 | 2 | 5  | 6  | 3  | 2  | 1  |
|                                    | 6 | 2  | 2 | 0 | 1 | 1 | 2 | 13 | 6  | 5  | 7  | 2  |
|                                    | 7 | 5  | 5 | 3 | 2 | 3 | 2 | 4  | 5  | 6  | 7  | 2  |
| <b>Between Batch Precision (%)</b> | 6 | 5  | 2 | 3 | 3 | 3 | 8 | 18 | 9  | 7  | 6  | 3  |
| <b>Between Batch Bias (%)</b>      | 2 | -9 | 1 | 7 | 7 | 0 |   | 19 | -4 | -7 | -6 | -8 |

**DL-Limonene**

|                                    |    |    |    |     |    |    |   |     |    |    |    |    |
|------------------------------------|----|----|----|-----|----|----|---|-----|----|----|----|----|
| <b>Within Batch Precision (%)</b>  |    |    |    |     |    |    |   |     |    |    |    |    |
| Batch #                            | 1  | 6  | 1  | 3   | 7  | 2  | 3 | 3   | 3  | 9  | 5  | 5  |
|                                    | 2  | 12 | 9  | 0   | 1  | 1  | 2 | 5   | 9  | 9  | 7  | 7  |
|                                    | 3  | 18 | 10 | 3   | 1  | 3  | 1 | 17  | 9  | 7  | 11 | 8  |
|                                    | 4  | 12 | 12 | 5   | 5  | 1  | 1 | 89  | 19 | 5  | 8  | 10 |
|                                    | 5  | 3  | 11 | 6   | 2  | 2  | 1 | 19  | 3  | 13 | 9  | 1  |
|                                    | 6  | 14 | 8  | 5   | 2  | 2  | 1 | --- | 33 | 17 | 9  | 10 |
|                                    | 7  | 12 | 6  | 3   | 3  | 0  | 1 | 8   | 9  | 14 | 5  | 6  |
| <b>Between Batch Precision (%)</b> | 14 | 10 | 10 | 6   | 4  | 3  | 3 | 46  | 19 | 13 | 9  | 10 |
| <b>Between Batch Bias (%)</b>      | 32 | 11 | -2 | -17 | -5 | 12 |   | 66  | 11 | 1  | 1  | -6 |

**Eucalyptol**

|                                    |    |    |    |    |   |    |   |     |     |    |    |    |
|------------------------------------|----|----|----|----|---|----|---|-----|-----|----|----|----|
| <b>Within Batch Precision (%)</b>  |    |    |    |    |   |    |   |     |     |    |    |    |
| Batch #                            | 1  | 22 | 12 | 2  | 2 | 2  | 4 | 28  | 26  | 9  | 17 | 11 |
|                                    | 2  | 10 | 7  | 4  | 1 | 1  | 2 | 19  | 12  | 11 | 2  | 7  |
|                                    | 3  | 8  | 5  | 3  | 5 | 2  | 1 | 10  | 22  | 8  | 8  | 2  |
|                                    | 4  | 13 | 4  | 1  | 1 | 1  | 2 | 36  | 1   | 3  | 12 | 10 |
|                                    | 5  | 24 | 4  | 2  | 4 | 2  | 1 | 48  | 11  | 25 | 2  | 5  |
|                                    | 6  | 25 | 15 | 3  | 3 | 2  | 0 | 76  | 18  | 16 | 14 | 3  |
|                                    | 7  | 18 | 9  | 2  | 6 | 1  | 2 | 146 | 6   | 13 | 7  | 7  |
| <b>Between Batch Precision (%)</b> | 19 | 9  | 3  | 5  | 4 | 4  | 4 | 62  | 19  | 13 | 10 | 8  |
| <b>Between Batch Bias (%)</b>      | 4  | -1 | -1 | -2 | 0 | -1 |   | -32 | -13 | -7 | -6 | -8 |

**Benzyl Alcohol**

|                                   |   |    |   |   |   |   |   |    |   |    |   |   |
|-----------------------------------|---|----|---|---|---|---|---|----|---|----|---|---|
| <b>Within Batch Precision (%)</b> |   |    |   |   |   |   |   |    |   |    |   |   |
| Batch #                           | 1 | 8  | 6 | 4 | 1 | 4 | 3 | 23 | 1 | 5  | 8 | 5 |
|                                   | 2 | 11 | 6 | 4 | 7 | 1 | 1 | 5  | 9 | 10 | 3 | 1 |
|                                   | 3 | 14 | 6 | 7 | 2 | 1 | 2 | 14 | 4 | 5  | 2 | 7 |

|                                    |    |    |    |   |   |   |    |    |    |    |   |    |
|------------------------------------|----|----|----|---|---|---|----|----|----|----|---|----|
|                                    | 4  | 4  | 4  | 1 | 2 | 1 | 2  | 11 | 11 | 2  | 6 | 3  |
|                                    | 5  | 5  | 13 | 4 | 1 | 1 | 2  | 22 | 6  | 6  | 2 | 1  |
|                                    | 6  | 4  | 4  | 5 | 3 | 1 | 2  | 13 | 9  | 6  | 2 | 3  |
|                                    | 7  | 16 | 3  | 3 | 2 | 3 | 2  | 4  | 8  | 2  | 1 | 2  |
| <b>Between Batch Precision (%)</b> | 13 | 11 | 7  | 5 | 4 | 4 | 9  | 21 | 13 | 14 | 9 | 11 |
| <b>Between Batch Bias (%)</b>      | -1 | -7 | 2  | 8 | 8 | 8 | -2 | 12 | 1  | 2  | 0 | 0  |

**Furaneol**

|                                    |    |    |   |   |   |    |     |    |    |    |    |    |
|------------------------------------|----|----|---|---|---|----|-----|----|----|----|----|----|
| <b>Within Batch Precision (%)</b>  |    |    |   |   |   |    |     |    |    |    |    |    |
| Batch #                            | 1  | 11 | 8 | 4 | 3 | 4  | 5   | 22 | 15 | 10 | 10 | 5  |
|                                    | 2  | 11 | 4 | 4 | 4 | 7  | --- | 2  | 7  | 3  | 3  | 5  |
|                                    | 3  | 9  | 5 | 2 | 4 | 7  | 24  | 7  | 9  | 4  | 6  | 1  |
|                                    | 4  | 14 | 1 | 3 | 4 | 6  | --- | 18 | 13 | 5  | 5  | 5  |
|                                    | 5  | 10 | 9 | 6 | 6 | 10 | --- | 18 | 14 | 9  | 2  | 7  |
|                                    | 6  | 19 | 5 | 5 | 2 | 4  | --- | 10 | 8  | 4  | 11 | 2  |
|                                    | 7  | 4  | 3 | 4 | 4 | 13 | --- | 35 | 9  | 3  | 8  | 2  |
| <b>Between Batch Precision (%)</b> | 13 | 5  | 4 | 4 | 7 | 7  | 17  | 21 | 12 | 9  | 9  | 5  |
| <b>Between Batch Bias (%)</b>      | 6  | -3 | 3 | 5 | 8 | 8  | 7   | 7  | -4 | -7 | -7 | -8 |

**Maltol**

|                                    |    |    |    |   |   |   |   |     |    |    |    |     |
|------------------------------------|----|----|----|---|---|---|---|-----|----|----|----|-----|
| <b>Within Batch Precision (%)</b>  |    |    |    |   |   |   |   |     |    |    |    |     |
| Batch #                            | 1  | 5  | 5  | 0 | 0 | 4 | 3 | 1   | 1  | 4  | 5  | 3   |
|                                    | 2  | 3  | 5  | 5 | 3 | 4 | 2 | 8   | 2  | 3  | 4  | 3   |
|                                    | 3  | 4  | 2  | 3 | 2 | 2 | 3 | 2   | 3  | 3  | 0  | 3   |
|                                    | 4  | 9  | 4  | 1 | 2 | 1 | 0 | 5   | 5  | 5  | 3  | 3   |
|                                    | 5  | 5  | 1  | 3 | 1 | 2 | 1 | 4   | 4  | 7  | 2  | 5   |
|                                    | 6  | 7  | 4  | 2 | 2 | 2 | 2 | 12  | 8  | 6  | 3  | 2   |
|                                    | 7  | 9  | 8  | 3 | 4 | 3 | 2 | 9   | 2  | 3  | 5  | 5   |
| <b>Between Batch Precision (%)</b> | 37 | 16 | 4  | 3 | 3 | 3 | 5 | 67  | 38 | 23 | 16 | 5   |
| <b>Between Batch Bias (%)</b>      | 42 | -2 | -3 | 5 | 9 | 9 | 3 | 217 | 34 | 2  | -6 | -14 |

**L-Menthol**

|                                    |    |    |    |    |   |   |   |     |    |    |    |    |
|------------------------------------|----|----|----|----|---|---|---|-----|----|----|----|----|
| <b>Within Batch Precision (%)</b>  |    |    |    |    |   |   |   |     |    |    |    |    |
| Batch #                            | 1  | 27 | 16 | 5  | 2 | 3 | 4 | 65  | 17 | 4  | 10 | 11 |
|                                    | 2  | 13 | 9  | 1  | 1 | 4 | 3 | 39  | 16 | 7  | 6  | 3  |
|                                    | 3  | 14 | 10 | 2  | 3 | 1 | 3 | 34  | 27 | 29 | 11 | 7  |
|                                    | 4  | 6  | 13 | 6  | 4 | 1 | 1 | 53  | 33 | 7  | 13 | 9  |
|                                    | 5  | 4  | 9  | 1  | 4 | 3 | 2 | 96  | 2  | 7  | 26 | 12 |
|                                    | 6  | 10 | 8  | 2  | 2 | 2 | 1 | 88  | 4  | 16 | 8  | 7  |
|                                    | 7  | 17 | 14 | 4  | 4 | 2 | 3 | --- | 20 | 25 | 13 | 3  |
| <b>Between Batch Precision (%)</b> | 18 | 12 | 4  | 3  | 4 | 4 | 4 | 114 | 29 | 22 | 17 | 8  |
| <b>Between Batch Bias (%)</b>      | 8  | 0  | -2 | -1 | 0 | 1 | 1 | -29 | 6  | 0  | -5 | -8 |



| <b>Methyl Salicylate</b>           |   |    |    |   |   |   |   |    |    |    |    |     |
|------------------------------------|---|----|----|---|---|---|---|----|----|----|----|-----|
| <b>Within Batch Precision (%)</b>  |   |    |    |   |   |   |   |    |    |    |    |     |
| Batch #                            | 1 | 6  | 6  | 2 | 3 | 1 | 2 | 22 | 8  | 8  | 7  | 3   |
|                                    | 2 | 2  | 4  | 0 | 1 | 1 | 1 | 14 | 10 | 3  | 1  | 3   |
|                                    | 3 | 10 | 2  | 1 | 2 | 1 | 1 | 9  | 5  | 3  | 5  | 3   |
|                                    | 4 | 4  | 5  | 3 | 3 | 1 | 1 | 4  | 2  | 5  | 3  | 6   |
|                                    | 5 | 2  | 4  | 2 | 3 | 4 | 1 | 7  | 7  | 5  | 3  | 1   |
|                                    | 6 | 2  | 2  | 2 | 1 | 2 | 2 | 14 | 6  | 3  | 4  | 8   |
|                                    | 7 | 15 | 8  | 3 | 2 | 1 | 2 | 3  | 12 | 3  | 7  | 6   |
| <b>Between Batch Precision (%)</b> |   | 18 | 7  | 3 | 3 | 2 | 3 | 54 | 22 | 11 | 9  | 5   |
| <b>Between Batch Bias (%)</b>      |   | 6  | -4 | 0 | 4 | 7 | 0 | 35 | -3 | -7 | -9 | -11 |

| <b>Ethyl Maltol</b>                |   |    |    |    |   |    |   |     |    |    |     |     |
|------------------------------------|---|----|----|----|---|----|---|-----|----|----|-----|-----|
| <b>Within Batch Precision (%)</b>  |   |    |    |    |   |    |   |     |    |    |     |     |
| Batch #                            | 1 | 2  | 7  | 2  | 1 | 1  | 1 | 4   | 5  | 9  | 8   | 4   |
|                                    | 2 | 1  | 10 | 3  | 2 | 4  | 0 | 9   | 3  | 3  | 9   | 3   |
|                                    | 3 | 3  | 6  | 2  | 2 | 1  | 1 | 5   | 2  | 3  | 7   | 3   |
|                                    | 4 | 7  | 6  | 1  | 4 | 2  | 1 | 4   | 2  | 11 | 6   | 2   |
|                                    | 5 | 9  | 3  | 4  | 3 | 2  | 1 | 5   | 3  | 7  | 8   | 4   |
|                                    | 6 | 1  | 6  | 2  | 3 | 2  | 1 | 13  | 5  | 5  | 5   | 4   |
|                                    | 7 | 4  | 8  | 3  | 2 | 3  | 2 | 8   | 10 | 4  | 1   | 7   |
| <b>Between Batch Precision (%)</b> |   | 18 | 8  | 5  | 5 | 4  | 3 | 40  | 22 | 14 | 10  | 5   |
| <b>Between Batch Bias (%)</b>      |   | 25 | -6 | -2 | 7 | 11 | 3 | 148 | 12 | -9 | -13 | -18 |

| <b>(+)Pulegone</b>                 |   |    |    |    |    |   |   |    |    |     |    |    |
|------------------------------------|---|----|----|----|----|---|---|----|----|-----|----|----|
| <b>Within Batch Precision (%)</b>  |   |    |    |    |    |   |   |    |    |     |    |    |
| Batch #                            | 1 | 6  | 11 | 1  | 3  | 1 | 3 | 26 | 13 | 13  | 9  | 5  |
|                                    | 2 | 4  | 3  | 3  | 2  | 1 | 0 | 9  | 6  | 4   | 4  | 2  |
|                                    | 3 | 5  | 5  | 2  | 2  | 0 | 1 | 13 | 5  | 4   | 4  | 3  |
|                                    | 4 | 15 | 4  | 4  | 3  | 1 | 2 | 4  | 6  | 6   | 3  | 3  |
|                                    | 5 | 12 | 3  | 2  | 3  | 6 | 1 | 9  | 13 | 6   | 9  | 6  |
|                                    | 6 | 1  | 7  | 2  | 3  | 2 | 1 | 13 | 5  | 5   | 9  | 5  |
|                                    | 7 | 12 | 13 | 1  | 1  | 2 | 3 | 17 | 4  | 10  | 7  | 0  |
| <b>Between Batch Precision (%)</b> |   | 9  | 7  | 3  | 3  | 3 | 3 | 17 | 9  | 9   | 7  | 5  |
| <b>Between Batch Bias (%)</b>      |   | 1  | -7 | -4 | -1 | 2 | 0 | 7  | -4 | -10 | -7 | -7 |

| <b>Ethyl Salicylate</b>           |   |    |   |   |   |   |   |   |    |   |   |   |
|-----------------------------------|---|----|---|---|---|---|---|---|----|---|---|---|
| <b>Within Batch Precision (%)</b> |   |    |   |   |   |   |   |   |    |   |   |   |
| Batch #                           | 1 | 7  | 6 | 1 | 1 | 0 | 1 | 2 | 13 | 8 | 7 | 3 |
|                                   | 2 | 10 | 4 | 0 | 2 | 1 | 1 | 5 | 1  | 6 | 4 | 3 |
|                                   | 3 | 1  | 5 | 4 | 1 | 0 | 2 | 8 | 3  | 2 | 5 | 2 |
|                                   | 4 | 4  | 4 | 1 | 1 | 2 | 1 | 7 | 8  | 8 | 1 | 4 |

|                                    |    |    |   |   |   |   |   |    |    |     |     |     |
|------------------------------------|----|----|---|---|---|---|---|----|----|-----|-----|-----|
|                                    | 5  | 7  | 4 | 2 | 0 | 3 | 1 | 13 | 5  | 2   | 6   | 4   |
|                                    | 6  | 10 | 3 | 1 | 3 | 3 | 2 | 6  | 3  | 10  | 4   | 3   |
|                                    | 7  | 13 | 4 | 2 | 2 | 1 | 1 | 10 | 4  | 4   | 4   | 4   |
| <b>Between Batch Precision (%)</b> | 7  | 5  | 2 | 2 | 2 | 2 | 3 | 18 | 8  | 6   | 5   | 4   |
| <b>Between Batch Bias (%)</b>      | -2 | -6 | 0 | 4 | 8 | 1 |   | 8  | -9 | -10 | -11 | -10 |

**trans-Cinnamaldehyde**

|                                    |    |     |    |    |    |     |     |    |    |    |    |    |
|------------------------------------|----|-----|----|----|----|-----|-----|----|----|----|----|----|
| <b>Within Batch Precision (%)</b>  |    |     |    |    |    |     |     |    |    |    |    |    |
| Batch #                            | 1  | 4   | 4  | 4  | 4  | 4   | 1   | 2  | 4  | 5  | 2  | 4  |
|                                    | 2  | 3   | 7  | 2  | 5  | 5   | --- | 23 | 10 | 2  | 7  | 4  |
|                                    | 3  | 1   | 4  | 4  | 2  | 5   | 13  | 18 | 13 | 4  | 4  | 3  |
|                                    | 4  | 9   | 5  | 2  | 1  | 8   | 13  | 8  | 11 | 11 | 3  | 4  |
|                                    | 5  | 5   | 5  | 2  | 2  | 11  | --- | 7  | 2  | 5  | 8  | 5  |
|                                    | 6  | 9   | 8  | 5  | 6  | 7   | --- | 6  | 11 | 3  | 5  | 3  |
|                                    | 7  | 9   | 4  | 2  | 2  | 11  | --- | 29 | 9  | 4  | 9  | 4  |
| <b>Between Batch Precision (%)</b> | 9  | 6   | 5  | 5  | 8  | 8   | 11  | 19 | 10 | 6  | 7  | 5  |
| <b>Between Batch Bias (%)</b>      | -3 | -13 | -5 | -2 | -1 | -18 |     | 9  | -6 | -7 | -9 | -8 |

**Triacetin**

|                                    |    |    |    |    |   |    |   |    |    |     |    |     |
|------------------------------------|----|----|----|----|---|----|---|----|----|-----|----|-----|
| <b>Within Batch Precision (%)</b>  |    |    |    |    |   |    |   |    |    |     |    |     |
| Batch #                            | 1  | 14 | 3  | 1  | 3 | 2  | 2 | 28 | 16 | 2   | 4  | 6   |
|                                    | 2  | 3  | 4  | 4  | 1 | 2  | 1 | 40 | 4  | 3   | 5  | 5   |
|                                    | 3  | 8  | 6  | 3  | 3 | 2  | 2 | 33 | 11 | 5   | 3  | 3   |
|                                    | 4  | 16 | 8  | 5  | 4 | 1  | 3 | 36 | 9  | 7   | 9  | 0   |
|                                    | 5  | 12 | 12 | 4  | 3 | 3  | 1 | 16 | 22 | 8   | 5  | 4   |
|                                    | 6  | 20 | 8  | 6  | 1 | 3  | 1 | 40 | 12 | 7   | 9  | 9   |
|                                    | 7  | 4  | 4  | 5  | 3 | 3  | 1 | 45 | 4  | 12  | 4  | 8   |
| <b>Between Batch Precision (%)</b> | 16 | 7  | 4  | 3  | 3 | 3  | 3 | 41 | 19 | 11  | 8  | 8   |
| <b>Between Batch Bias (%)</b>      | -6 | -7 | -4 | -1 | 1 | -2 |   | -7 | -8 | -11 | -8 | -13 |

**Eugenol**

|                                    |    |     |    |   |   |   |   |    |     |     |     |     |
|------------------------------------|----|-----|----|---|---|---|---|----|-----|-----|-----|-----|
| <b>Within Batch Precision (%)</b>  |    |     |    |   |   |   |   |    |     |     |     |     |
| Batch #                            | 1  | 0   | 4  | 4 | 3 | 2 | 3 | 7  | 8   | 2   | 8   | 2   |
|                                    | 2  | 1   | 6  | 1 | 2 | 1 | 3 | 3  | 7   | 3   | 4   | 3   |
|                                    | 3  | 3   | 4  | 1 | 3 | 2 | 3 | 4  | 4   | 3   | 4   | 2   |
|                                    | 4  | 4   | 5  | 2 | 3 | 3 | 2 | 13 | 4   | 7   | 8   | 7   |
|                                    | 5  | 10  | 5  | 1 | 2 | 5 | 1 | 11 | 7   | 10  | 5   | 4   |
|                                    | 6  | 5   | 4  | 3 | 1 | 1 | 2 | 5  | 8   | 6   | 4   | 4   |
|                                    | 7  | 7   | 2  | 2 | 1 | 3 | 3 | 13 | 13  | 8   | 3   | 0   |
| <b>Between Batch Precision (%)</b> | 11 | 5   | 3  | 3 | 3 | 3 | 3 | 30 | 14  | 8   | 6   | 4   |
| <b>Between Batch Bias (%)</b>      | -1 | -10 | -1 | 5 | 9 | 0 |   | 13 | -15 | -20 | -21 | -22 |

**Vanillin**

| <b>Within Batch Precision (%)</b>  |   |           |           |    |   |   |   |           |           |           |            |     |
|------------------------------------|---|-----------|-----------|----|---|---|---|-----------|-----------|-----------|------------|-----|
| Batch #                            | 1 | 4         | 2         | 1  | 1 | 4 | 3 | 4         | 5         | 3         | 5          | 4   |
|                                    | 2 | 10        | 9         | 1  | 2 | 1 | 2 | 5         | 5         | 8         | 9          | 3   |
|                                    | 3 | 4         | 4         | 3  | 3 | 1 | 3 | <b>41</b> | 14        | 7         | 5          | 7   |
|                                    | 4 | 5         | 3         | 3  | 3 | 1 | 1 | 4         | 9         | 3         | 3          | 7   |
|                                    | 5 | 18        | 3         | 4  | 3 | 3 | 1 | <b>21</b> | 17        | 2         | 5          | 2   |
|                                    | 6 | 11        | 2         | 1  | 2 | 3 | 1 | 10        | 2         | 7         | 7          | 5   |
|                                    | 7 | 16        | 3         | 3  | 1 | 4 | 2 | 10        | 6         | 3         | 2          | 5   |
| <b>Between Batch Precision (%)</b> |   | <b>35</b> | <b>13</b> | 6  | 7 | 5 | 6 | <b>86</b> | <b>41</b> | <b>21</b> | 14         | 9   |
| <b>Between Batch Bias (%)</b>      |   | <b>31</b> | <b>-3</b> | -5 | 1 | 7 | 2 | <b>97</b> | 17        | -3        | <b>-11</b> | -20 |

#### Ethyl Vanillin

| <b>Within Batch Precision (%)</b>  |   |    |    |   |   |   |   |           |    |    |     |     |
|------------------------------------|---|----|----|---|---|---|---|-----------|----|----|-----|-----|
| Batch #                            | 1 | 2  | 7  | 1 | 3 | 2 | 3 | <b>21</b> | 10 | 7  | 21  | 2   |
|                                    | 2 | 16 | 7  | 2 | 4 | 0 | 2 | <b>8</b>  | 17 | 1  | 2   | 4   |
|                                    | 3 | 9  | 4  | 2 | 3 | 1 | 1 | <b>35</b> | 9  | 9  | 4   | 5   |
|                                    | 4 | 4  | 6  | 5 | 2 | 2 | 2 | <b>13</b> | 19 | 9  | 9   | 1   |
|                                    | 5 | 16 | 7  | 4 | 2 | 4 | 1 | <b>75</b> | 6  | 8  | 9   | 4   |
|                                    | 6 | 9  | 2  | 2 | 2 | 2 | 2 | <b>20</b> | 4  | 13 | 12  | 10  |
|                                    | 7 | 13 | 4  | 2 | 3 | 3 | 2 | <b>9</b>  | 8  | 7  | 5   | 5   |
| <b>Between Batch Precision (%)</b> |   | 13 | 6  | 3 | 3 | 3 | 4 | <b>47</b> | 15 | 9  | 11  | 10  |
| <b>Between Batch Bias (%)</b>      |   | 5  | -6 | 1 | 5 | 9 | 2 | <b>9</b>  | -7 | -7 | -16 | -15 |

#### Isovanillin

| <b>Within Batch Precision (%)</b>  |   |    |    |   |   |   |   |           |    |     |     |     |
|------------------------------------|---|----|----|---|---|---|---|-----------|----|-----|-----|-----|
| Batch #                            | 1 | 14 | 2  | 3 | 3 | 2 | 4 | <b>5</b>  | 8  | 3   | 4   | 8   |
|                                    | 2 | 1  | 1  | 1 | 5 | 6 | 4 | <b>10</b> | 4  | 10  | 5   | 3   |
|                                    | 3 | 2  | 7  | 4 | 5 | 7 | 2 | <b>57</b> | 4  | 8   | 6   | 4   |
|                                    | 4 | 11 | 8  | 5 | 6 | 5 | 6 | <b>39</b> | 11 | 3   | 6   | 2   |
|                                    | 5 | 9  | 8  | 1 | 5 | 2 | 6 | <b>14</b> | 5  | 11  | 3   | 3   |
|                                    | 6 | 3  | 1  | 4 | 2 | 5 | 6 | <b>27</b> | 8  | 3   | 11  | 2   |
|                                    | 7 | 11 | 3  | 6 | 1 | 6 | 3 | <b>23</b> | 16 | 7   | 5   | 1   |
| <b>Between Batch Precision (%)</b> |   | 12 | 5  | 5 | 4 | 5 | 5 | <b>49</b> | 10 | 9   | 7   | 6   |
| <b>Between Batch Bias (%)</b>      |   | 1  | -7 | 1 | 5 | 8 | 1 | <b>11</b> | -6 | -14 | -12 | -12 |

<sup>1</sup>Averaged from 7 independent batches analyzed across 7 days

Italicized and grey indicates values outside of the instrument linear range where recovery is estimated. Bold indicates values outside of 80-120% percent recovery or  $\pm 20\%$  CV.

Supplemental Table 6 – Carryover Assessment with 50:50 PG:VG and Methanol Matrix Blanks

| <i>Matrix blank assessed</i>                                 | <i>50:50 PG:VG</i> |                | <i>Methanol</i> |                |
|--------------------------------------------------------------|--------------------|----------------|-----------------|----------------|
|                                                              | <i>8mg/mL</i>      | <i>10mg/mL</i> | <i>8mg/mL</i>   | <i>10mg/mL</i> |
| <i>Standard concentration injected prior to matrix blank</i> |                    |                |                 |                |
| <b><i>Average Carryover (mg/mL)</i></b>                      |                    |                |                 |                |
| Acetoin                                                      | 0.00               | 0.00           | 0.00            | 0.00           |
| Butanoic Acid                                                | <b>0.04</b>        | <b>0.04</b>    | 0.00            | 0.00           |
| Benzaldehyde                                                 | 0.00               | 0.00           | 0.00            | 0.00           |
| 2,3,5-Trimethylpyrazine                                      | 0.00               | 0.00           | 0.00            | 0.00           |
| DL-Limonene                                                  | 0.00               | 0.00           | 0.00            | 0.00           |
| Eucalyptol                                                   | 0.00               | 0.00           | 0.00            | 0.00           |
| Benzyl Alcohol                                               | 0.00               | 0.00           | 0.00            | 0.00           |
| Furaneol                                                     | 0.00               | 0.00           | 0.00            | 0.00           |
| Maltol                                                       | <b>0.04</b>        | <b>0.04</b>    | <b>0.03</b>     | <b>0.03</b>    |
| L-Menthol                                                    | 0.00               | 0.00           | 0.00            | 0.00           |
| Methyl Salicylate                                            | 0.00               | 0.00           | 0.00            | 0.00           |
| Ethyl Maltol                                                 | <b>0.03</b>        | <b>0.03</b>    | <b>0.02</b>     | <b>0.01</b>    |
| (+)Pulegone                                                  | 0.00               | 0.00           | 0.00            | 0.00           |
| Ethyl Salicylate                                             | 0.00               | 0.00           | 0.00            | 0.00           |
| trans-Cinnamaldehyde                                         | 0.00               | 0.00           | <b>0.01</b>     | <b>0.01</b>    |
| Triacetin                                                    | 0.00               | 0.00           | 0.00            | 0.00           |
| Eugenol                                                      | 0.00               | 0.00           | 0.00            | 0.00           |
| Vanillin                                                     | <b>0.05</b>        | 0.00           | <b>0.04</b>     | 0.00           |
| Ethyl Vanillin                                               | <b>0.01</b>        | 0.00           | 0.00            | 0.00           |
| Isovanillin                                                  | 0.00               | <b>0.01</b>    | <b>0.02</b>     | <b>0.01</b>    |

Supplemental Table 7 – Dilution Precision and Bias Determined from Four Dilution Factors

| <i>Dilution Factor</i>                               | 2X  |     |      | 5X  |     |      | 10X |      | 50X |       |
|------------------------------------------------------|-----|-----|------|-----|-----|------|-----|------|-----|-------|
| <i>Fortified Matrix Sample Concentration (mg/mL)</i> | 5   | 10  | 18.6 | 5   | 10  | 18.6 | 10  | 18.6 | 10  | 18.6  |
| <i>Concentration after dilution (mg/mL)</i>          | 2.5 | 5   | 9.3  | 1   | 2   | 3.72 | 1   | 1.86 | 0.2 | 0.372 |
| <b><i>Between Run Precision (CV%)</i></b>            |     |     |      |     |     |      |     |      |     |       |
| Acetoin                                              | 7   | 7   | 2    | 7   | 9   | 6    | 11  | 6    | 17  | 17    |
| Butanoic Acid                                        | 14  | 16  | 19   | 15  | 13  | 4    | 20  | 5    | 16  | 14    |
| Benzaldehyde                                         | 3   | 2   | 6    | 3   | 5   | 6    | 9   | 5    | 8   | 11    |
| 2,3,5-Trimethylpyrazine                              | 5   | 6   | 10   | 7   | 6   | 5    | 7   | 4    | 9   | 16    |
| DL-Limonene                                          | 10  | 7   | 16   | 13  | 13  | 14   | 19  | 8    | 11  | 7     |
| Eucalyptol                                           | 4   | 3   | 10   | 4   | 5   | 4    | 9   | 7    | 7   | 8     |
| Benzyl Alcohol                                       | 10  | 4   | 14   | 26  | 18  | 7    | 23  | 21   | 41  | 46    |
| Furaneol                                             | 11  | 17  | 28   | 11  | 19  | 27   | 18  | 17   | 10  | 23    |
| Maltol                                               | 4   | 6   | 5    | 3   | 6   | 3    | 6   | 6    | 9   | 10    |
| L-Menthol                                            | 3   | 5   | 10   | 4   | 5   | 4    | 6   | 6    | 5   | 14    |
| Methyl Salicylate                                    | 4   | 3   | 9    | 6   | 4   | 4    | 7   | 6    | 6   | 16    |
| Ethyl Maltol                                         | 4   | 4   | 3    | 5   | 6   | 5    | 7   | 7    | 12  | 13    |
| (+)Pulegone                                          | 5   | 2   | 9    | 6   | 6   | 4    | 5   | 5    | 8   | 17    |
| Ethyl Salicylate                                     | 3   | 5   | 10   | 3   | 3   | 5    | 6   | 5    | 6   | 13    |
| trans-Cinnamaldehyde                                 | 4   | 12  | ---  | 9   | 15  | 13   | 19  | 17   | 15  | 23    |
| Triacetin                                            | 4   | 4   | 8    | 7   | 6   | 5    | 7   | 6    | 13  | 20    |
| Eugenol                                              | 4   | 4   | 7    | 5   | 5   | 4    | 6   | 3    | 8   | 17    |
| Vanillin                                             | 9   | 7   | 9    | 7   | 7   | 8    | 8   | 9    | 16  | 19    |
| Ethyl Vanillin                                       | 5   | 6   | 3    | 8   | 4   | 6    | 5   | 7    | 14  | 17    |
| Isovanillin                                          | 5   | 2   | 19   | 5   | 4   | 13   | 9   | 15   | 11  | 23    |
| <b><i>Between Run Bias (CV%)</i></b>                 |     |     |      |     |     |      |     |      |     |       |
| Acetoin                                              | 9   | 6   | -2   | 7   | 1   | -7   | 17  | -10  | 19  | -14   |
| Butanoic Acid                                        | -11 | -5  | -14  | -17 | -14 | -3   | -14 | -4   | -14 | -33   |
| Benzaldehyde                                         | 16  | 16  | 0    | 14  | 16  | 7    | 25  | 6    | 16  | -10   |
| 2,3,5-Trimethylpyrazine                              | 14  | 8   | -5   | 10  | 10  | 3    | 21  | 5    | 13  | -15   |
| DL-Limonene                                          | 26  | 28  | -9   | 11  | 42  | 8    | 41  | 1    | 45  | 4     |
| Eucalyptol                                           | 5   | 7   | -9   | 3   | 5   | -9   | 14  | -10  | 8   | -23   |
| Benzyl Alcohol                                       | 24  | 10  | -12  | 33  | 25  | 6    | 47  | 20   | 54  | 19    |
| Furaneol                                             | -11 | -21 | -37  | -18 | -26 | -42  | -14 | -38  | -11 | -39   |

|                      |    |     |           |    |            |     |            |     |           |            |
|----------------------|----|-----|-----------|----|------------|-----|------------|-----|-----------|------------|
| Maltol               | 11 | 13  | -3        | 0  | 9          | 5   | 14         | 1   | -2        | <b>-26</b> |
| L-Menthol            | 5  | 9   | -4        | 5  | 7          | -4  | <b>22</b>  | 1   | <b>29</b> | -6         |
| Methyl Salicylate    | 13 | 12  | -10       | 8  | 17         | 3   | <b>24</b>  | 5   | 15        | -13        |
| Ethyl Maltol         | 13 | 13  | -6        | 2  | 11         | 0   | 13         | -4  | -3        | <b>-28</b> |
| (+)Pulegone          | 9  | 7   | -9        | 6  | 6          | -5  | 17         | -2  | 18        | -11        |
| Ethyl Salicylate     | 20 | 14  | -9        | 16 | <b>21</b>  | 6   | <b>31</b>  | 10  | 20        | -9         |
| trans-Cinnamaldehyde | 15 | 9   | -8        | 7  | -4         | -13 | 7          | -14 | 19        | -17        |
| Triacetin            | 6  | 5   | -8        | 4  | 6          | -7  | 15         | -5  | 16        | -15        |
| Eugenol              | 15 | 10  | -8        | 9  | 12         | 1   | 19         | 3   | 12        | -14        |
| Vanillin             | -1 | -8  | 7         | -5 | -13        | 1   | -7         | 2   | <i>-8</i> | -15        |
| Ethyl Vanillin       | 6  | -5  | 11        | 1  | -7         | 8   | 2          | 9   | -1        | -6         |
| Isovanillin          | -2 | -18 | <b>53</b> | -4 | <b>-26</b> | 20  | <b>-21</b> | 17  | -19       | 1          |

Italicized and grey indicates values outside of the instrument linear range where recovery is estimated. Bold indicates values outside of  $\pm 20\%$  CV.



Supplemental Figure 1 – Calibration Curves for Twenty Flavoring Chemicals

(A) Acetoin

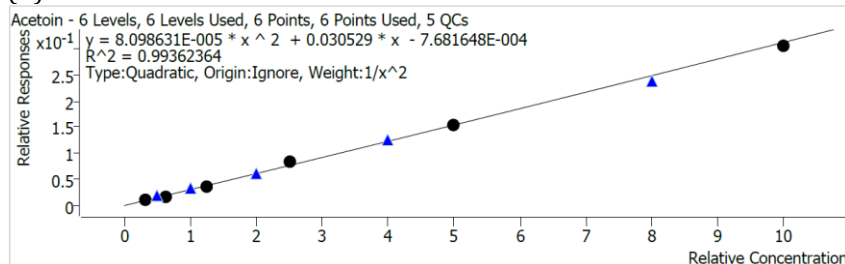

(B) Butanoic Acid

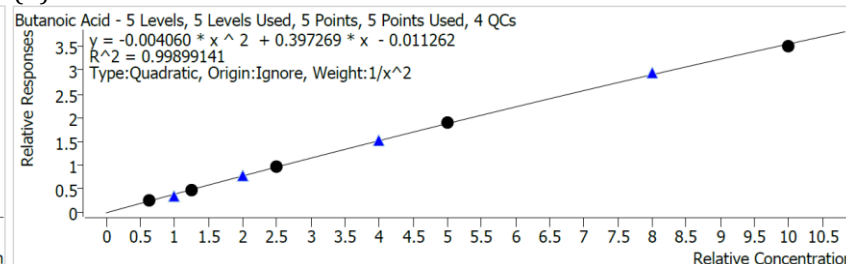

(C) Benzaldehyde

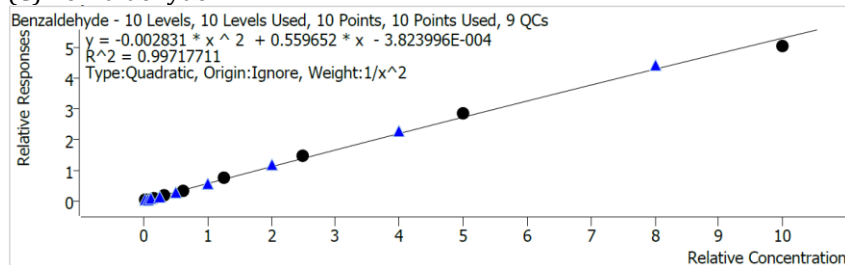

(D) 2,3,5-Trimethylpyrazine

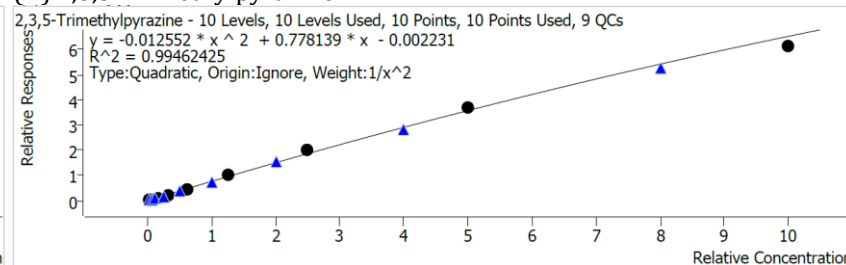

(E) DL-Limonene

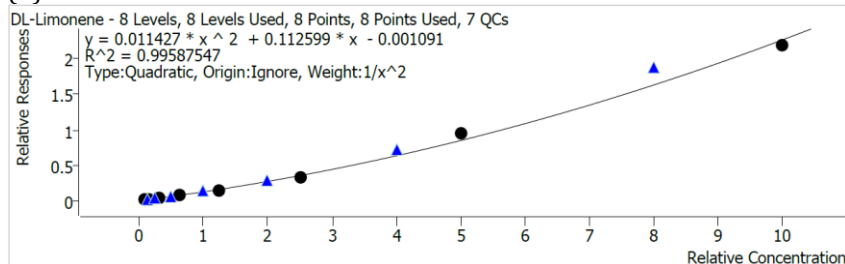

(F) Eucalyptol

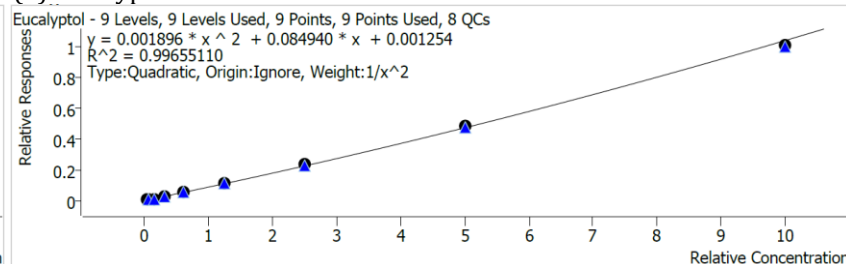

(G) Benzyl Alcohol

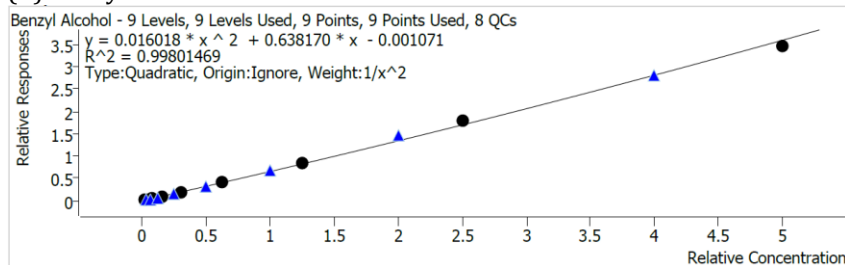

(H) Furaneol

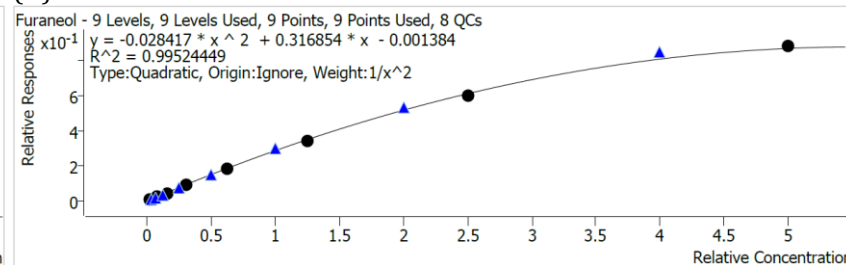



(I) Maltol

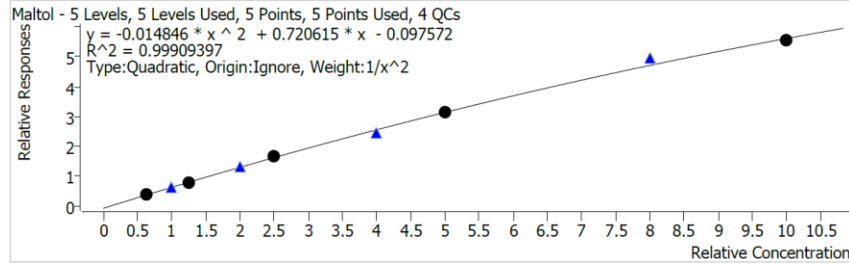

(J) L-Menthol

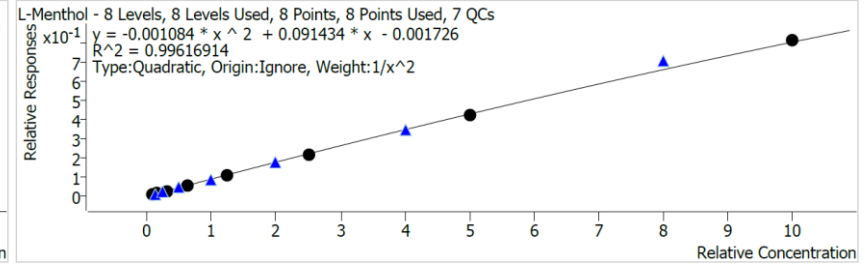

(K) Methyl Salicylate

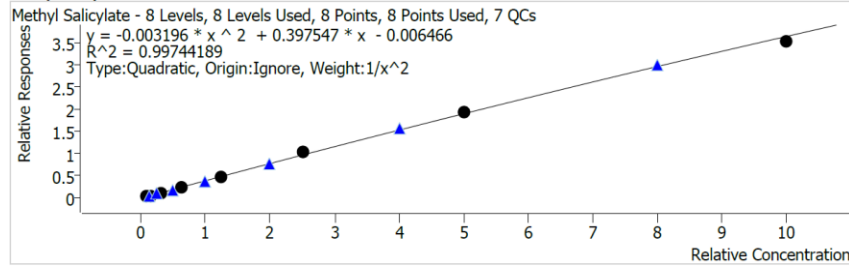

(L) Ethyl Maltol

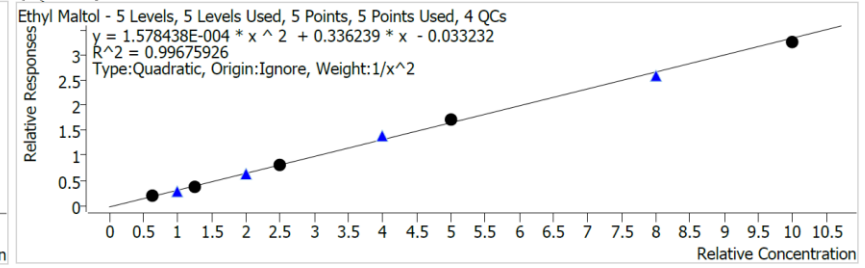

(M) (+)Pulegone

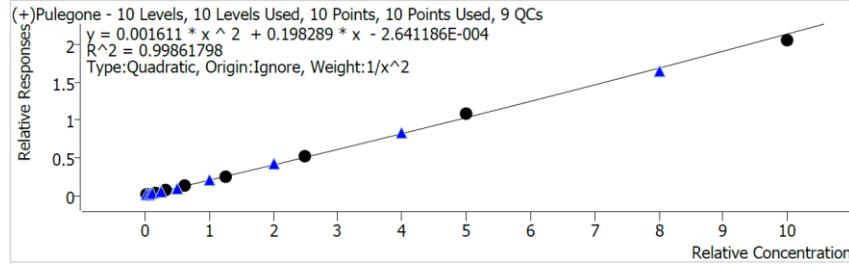

(N) Ethyl Salicylate

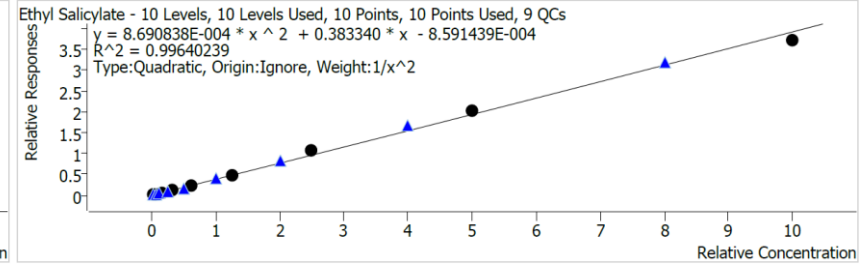

(O) trans-Cinnamaldehyde

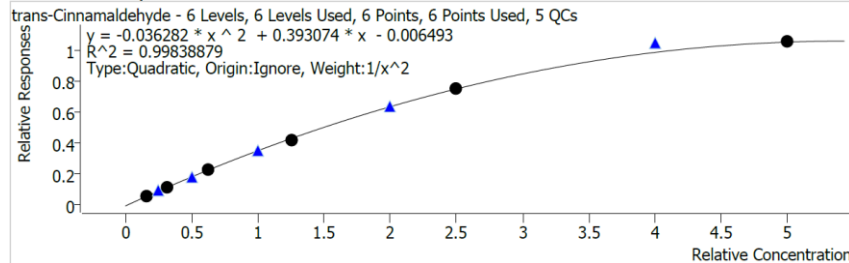

(P) Triacetin

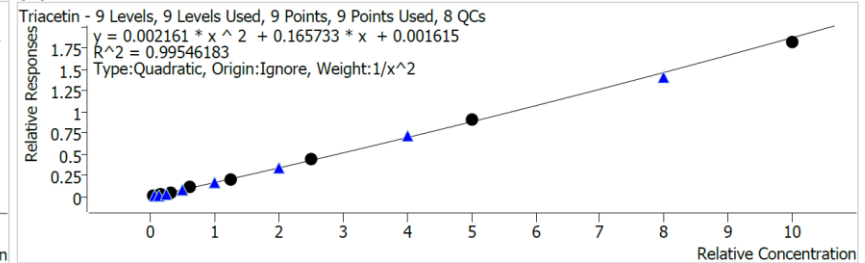

**(Q) Eugenol**

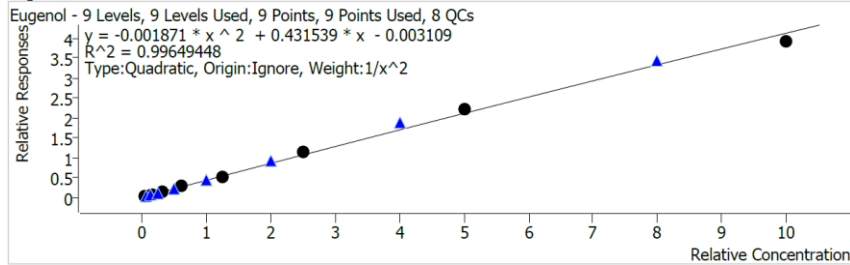

**(R) Vanillin**

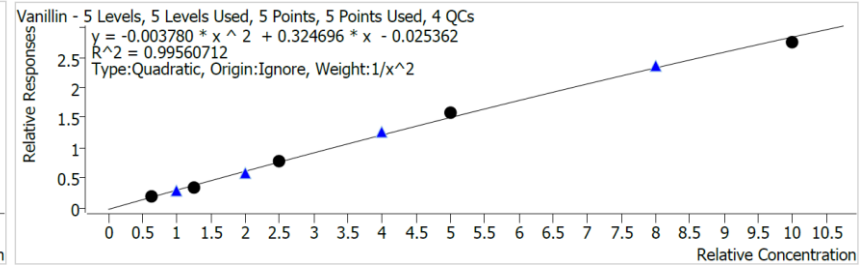

**(S) Ethyl Vanillin**

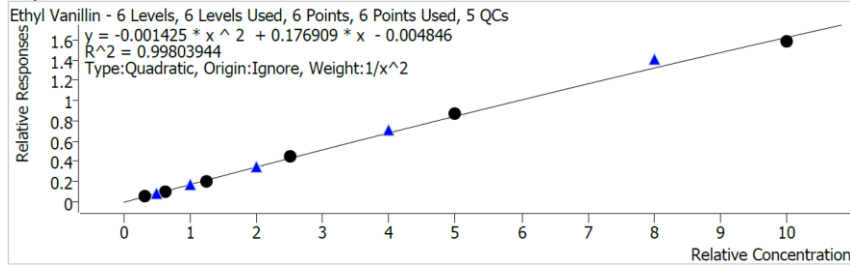

**(T) Isovanillin**

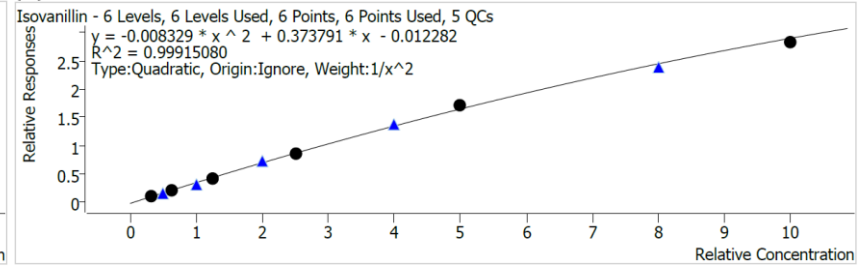

Circles (black) indicate calibration standards within the working calibration range (Supplemental Table 3) and are included in the calculation of the curve and corresponding r<sup>2</sup> value.

Triangles (blue) indicate quality control standards within the working calibration range.
